# Supplementary material for: What Is the Current Direction of the Research on Carotenoids and Human Health? An Overview of Registered Clinical Trials
Source: MDPI journal article supplement (doi:10.3390/nu14061191), 2022-03-11
Supplement: s1 [file s1]

Supplementary Table S1: “List of the registered clinical trials.”

| Rank | Trial Number   | Title                                                                                                                                                                                                                                                          |
|------|----------------|----------------------------------------------------------------------------------------------------------------------------------------------------------------------------------------------------------------------------------------------------------------|
| 1    | ISRCTN18206561 | The efficacy of different nutritional formulas of lutein, zeaxanthin, and meso-zeaxanthin and their impact on the human body                                                                                                                                   |
| 2    | ISRCTN13244115 | Effect of a tomato sauce (OsteoCol) from vine-ripened tomatoes on lipids                                                                                                                                                                                       |
| 3    | ISRCTN16156382 | Effect of Lutemax 2020 on blue light and visual health markers                                                                                                                                                                                                 |
| 4    | ISRCTN17604865 | Effect of Lutemax 2020 on visual and brain health markers                                                                                                                                                                                                      |
| 5    | ISRCTN15646478 | A randomized, double-blind, placebo-controlled study to investigate the effects of OmniActive Lutemax 2020® oil suspension on skin health attributesA randomized, double-blind, placebo-controlled study to investigate the effects of OmniActive Lutemax 2020 |
| 6    | ISRCTN54990825 | Effects of three levels of macular carotenoid supplementation on macular pigment optical density, psychological stress levels, and overall health                                                                                                              |
| 7    | ISRCTN86297454 | Can an increase in fruit and vegetable intake improve/change your skin colour and appearance?                                                                                                                                                                  |
| 8    | ISRCTN56985060 | Macular Pigment and Glaucoma Trial                                                                                                                                                                                                                             |
| 9    | ISRCTN25867083 | Egg Xanthophyll Interventional Trial                                                                                                                                                                                                                           |
| 10   | ISRCTN99660610 | Assessment of different doses of tomato intake on blood pressure and endothelial function in patients at high vascular risk: nutrigenomics effect on different phenotypes of risk                                                                              |
| 11   | ISRCTN68270512 | Central Retinal Enrichment Supplementation Trials - enrichment of macular pigment with respect to vision in Normal subjects                                                                                                                                    |
| 12   | ISRCTN42483402 | Amyloid $\beta$ levels in human red blood cells                                                                                                                                                                                                                |
| 13   | ISRCTN55089134 | The effect of the dietary antioxidant supplements lutein and zeaxanthin on retinal macular pigment optical density                                                                                                                                             |
| 14   | ISRCTN10624844 | Lutein and zeaxanthin supplementation in preterm infants to prevent retinopathy of prematurity                                                                                                                                                                 |
| 15   | ISRCTN34203810 | Effects of tomato-based foods on cardiovascular disease risk                                                                                                                                                                                                   |
| 16   | ISRCTN29971311 | Lutein supplementation in very low birth weight (VLBW) neonates in neonatal intensive care units (NICU)                                                                                                                                                        |
| 17   | ISRCTN81595685 | Age-related macular degeneration Meso-zeaxanthin Ocular Supplementation trial (AMOST)                                                                                                                                                                          |
| 18   | ISRCTN60816411 | Meso-zeaxanthin Ocular Supplementation Trial (MOST)                                                                                                                                                                                                            |
| 19   | NCT00006202    | Lutein for Age-Related Macular Degeneration                                                                                                                                                                                                                    |
| 20   | NCT00006078    | Lycopene In Preventing of Prostate Cancer                                                                                                                                                                                                                      |
| 21   | NCT04744233    | Bioavailability of Carotenoids From Orange Juice in a Cross-over Study in Healthy Subjects.                                                                                                                                                                    |
| 22   | NCT00198822    | Impact of Maternal Vitamin A or Beta-Carotene Supplementation on Maternal and Infant Mortality in Bangladesh                                                                                                                                                   |
| 23   | NCT00029289    | Effects of Lutein in Retinitis Pigmentosa                                                                                                                                                                                                                      |

|    |             |                                                                                                                                          |
|----|-------------|------------------------------------------------------------------------------------------------------------------------------------------|
| 24 | NCT00156169 | The Effect of the Alga Dunaliella Bardawil as a Source of 9-cis Retinoic Acid on Lipid Profile in Fibrate Treated Patients.              |
| 25 | NCT00356252 | Biological Functions of Carotenoids in Humans                                                                                            |
| 26 | NCT00275418 | Beta Carotene From Natural Source for Patients With Non-Active Crohn's Disease                                                           |
| 27 | NCT02292524 | Prostate Biomarkers in Men Consuming Tomato Products                                                                                     |
| 28 | NCT00128752 | The CARO Study - Bioefficacy of Beta-Carotene in Oil and in a Mixed Diet in Healthy Subjects                                             |
| 29 | NCT00346333 | Clinical Trial of Lutein for Patients With Retinitis Pigmentosa Receiving Vitamin A                                                      |
| 30 | NCT00178113 | A Pilot Study of Lycopene Supplementation in Prostatic Intraepithelial Neoplasia                                                         |
| 31 | NCT00402285 | Lycopene or Omega-3 Fatty Acid Nutritional Supplements in Treating Patients With Stage I or Stage II Prostate Cancer                     |
| 32 | NCT00680277 | Vitamin A Value of Spirulina Carotenoids in Humans                                                                                       |
| 33 | NCT00680355 | Bioavailability of Golden Rice Carotenoids in Humans                                                                                     |
| 34 | NCT00718653 | Effects of Antioxidants on Human Macular Pigments                                                                                        |
| 35 | NCT00128804 | The STOVITA Study - Bioefficacy of Beta-Carotene in Oil and in a Mixed Diet in Ileostomy Patients                                        |
| 36 | NCT00154843 | A Clinical Study to Determine Factors Affecting Absorption and Serum Levels of Lycopene After Supplementation                            |
| 37 | NCT00068731 | Lycopene in Treating Patients With Metastatic Prostate Cancer                                                                            |
| 38 | NCT00093561 | Lycopene in Preventing Prostate Cancer in Healthy Participants                                                                           |
| 39 | NCT00656214 | Treatment of Oral Lichen Planus With Lycopene                                                                                            |
| 40 | NCT00672230 | Dietary Lutein and the Retinopathy of Prematurity                                                                                        |
| 41 | NCT00913406 | Effect of Lutein in S-26 Gold On Growth And Safety                                                                                       |
| 42 | NCT00879671 | Effects of Lutein Supplementation on Macular Pigment Optical Density and Visual Acuity in Patients With Age-related Macular Degeneration |
| 43 | NCT01443026 | The Effects of Lycopene on High Risk Prostatic Tissue                                                                                    |
| 44 | NCT00450957 | Lycopene in Healthy Male Participants                                                                                                    |
| 45 | NCT00322114 | Lycopene in Preventing Prostate Cancer in Healthy Participants                                                                           |
| 46 | NCT00172367 | Chemoprevention Trial for Uremia-Associated Urothelial Carcinoma                                                                         |
| 47 | NCT00449917 | Visiobiane Anti-age Effects on Vision Parameters                                                                                         |
| 48 | NCT00453648 | Impact of Consumption of Orange-fleshed Sweet Potatoes on the Vitamin A Status of Bangladeshi Women of Reproductive Age                  |
| 49 | NCT02348164 | Human Lycopene and Beta-cryptoxanthin Absorption From Citrus Fruit                                                                       |
| 50 | NCT00596024 | Lutein and Alzheimer's Disease Study                                                                                                     |
| 51 | NCT01042860 | The Influence of Lutein Supplements on Age-related Macular Degeneration                                                                  |
| 52 | NCT00564902 | The Zeaxanthin and Visual Function Study                                                                                                 |
| 53 | NCT00636350 | Bioavailability of Pepper Carotenoids in Humans                                                                                          |
| 54 | NCT00569023 | Treatment of Congenital Stationary Night Blindness With an Alga Containing High Dose of Beta Carotene                                    |
| 55 | NCT00527553 | The Effect of Eggs and Egg Products on Macular Pigment                                                                                   |

|    |             |                                                                                                                                                  |
|----|-------------|--------------------------------------------------------------------------------------------------------------------------------------------------|
| 56 | NCT00539916 | Effects of Regular and Consequent Citrus Fruits Consumption on Vascular Protection                                                               |
| 57 | NCT00680212 | Vitamin A Equivalence of Plant Carotenoids in Children                                                                                           |
| 58 | NCT00636038 | Bioavailability of Yellow Maize Carotenoids in Humans                                                                                            |
| 59 | NCT00450749 | Lycopene in Treating Patients Undergoing Radical Prostatectomy for Prostate Cancer                                                               |
| 60 | NCT01256697 | The Effect of Oral Administration of 9-cis Rich Powder of the Alga Dunaliella Bardawil on Visual Functions in Patients With Retinitis Pigmentosa |
| 61 | NCT00937742 | The Effect of Processed Tomato Products on CVD Risks                                                                                             |
| 62 | NCT01048476 | Effects of Lutein and Zeaxanthin Supplementation on Age-related Macular Degeneration                                                             |
| 63 | NCT00872664 | Skin and Serum Carotenoids in Preterm Infants Fed on a Formula Supplemented With Carotenoids                                                     |
| 64 | NCT00909090 | Macular Pigment and Glare Disability                                                                                                             |
| 65 | NCT00902408 | Effect of Lutein-enriched-egg Beverage on Age-Related Macular Degeneration (AMD)                                                                 |
| 66 | NCT01175577 | Feeding the Rainbow to Investigate Endothelial Dysfunction                                                                                       |
| 67 | NCT01221558 | Effects of Lycopene on Oxidative Stress and Markers of Endothelial Function in Healthy Men                                                       |
| 68 | NCT01105338 | Lycopene or Green Tea for Men at Risk of Prostate Cancer                                                                                         |
| 69 | NCT00939237 | Trial of Lycopene/Ateronon for Secondary Prevention of Coronary Heart Disease                                                                    |
| 70 | NCT01142960 | Effects of Lycium Barbarum Supplements on the Progression of Senile Cataract in Hong Kong Chinese Population                                     |
| 71 | NCT00948363 | The Effect of Kiwi on Blood Pressure, Endothelial Function, Antioxidant Capacity and Gene Expression                                             |
| 72 | NCT01342666 | Tomato Consumption and High Density Lipoprotein-cholesterol                                                                                      |
| 73 | NCT01528605 | Effects of Lutein and Zeaxanthin Supplementation on Early Age-related Macular Degeneration                                                       |
| 74 | NCT01534533 | Effects of Lutein Supplementation on Subclinical Atherosclerosis                                                                                 |
| 75 | NCT03945526 | Effect of Astaxanthin Supplementation on Plasma Malondialdehyde Levels and NIHSS of Stroke Patients                                              |
| 76 | NCT01316198 | Effects of Xanthophylls on Optical Density                                                                                                       |
| 77 | NCT01056094 | Effects of Lutein Supplementation on Oxidative Stress and Inflammation in Healthy Nonsmokers                                                     |
| 78 | NCT01420406 | Vitamin A Bioavailability in Lactating Women With Marginal Vitamin A Status                                                                      |
| 79 | NCT01477112 | Low Dose $\beta$ -carotene Supplementation Diminishes Oxidative Stress in Type 2 Diabetics and Healthy Individuals                               |
| 80 | NCT00905931 | Lycopene Following Aneurysmal Subarachnoid Haemorrhage                                                                                           |
| 81 | NCT01241877 | Astaxanthin Supplementation in Cyclists                                                                                                          |
| 82 | NCT01167205 | Positive Effects of Haematococcus Astaxanthin on Oxidative Stress and Lipid Profile in Overweight and Obese Adults                               |

|     |             |                                                                                                                                                                                                        |
|-----|-------------|--------------------------------------------------------------------------------------------------------------------------------------------------------------------------------------------------------|
| 83  | NCT01121081 | The Effect of Algae Dunaliella Bardawil on Psoriasis (2)                                                                                                                                               |
| 84  | NCT01100385 | TomVasc - Vascular Effects of Tomato Extract                                                                                                                                                           |
| 85  | NCT02068807 | Evaluation of Antioxidant Activity of Oral Lutein in Preterm and Term Newborn                                                                                                                          |
| 86  | NCT01748916 | Comparison of Carotenoid Bioavailability From Fresh Papaya, Tomato and Carrot                                                                                                                          |
| 87  | NCT01403844 | Carotenoid Response to the Intake of Vegetables and Fruits                                                                                                                                             |
| 88  | NCT01400763 | Lutein Bioavailability From Fresh and Dried Beverages                                                                                                                                                  |
| 89  | NCT01381276 | Vitamin A Absorption From Cassava in Women                                                                                                                                                             |
| 90  | NCT01432210 | Provitamin A Absorption and Conversion With Avocados                                                                                                                                                   |
| 91  | NCT01323036 | Krill Oil Study Compared to Fish Oil                                                                                                                                                                   |
| 92  | NCT01462825 | The Effect of Tomato Ketchup on Inflammation                                                                                                                                                           |
| 93  | NCT02276014 | Effect of SNPs in the BCMO1 Enzyme                                                                                                                                                                     |
| 94  | NCT02023645 | The Effects of a Carotenoid Intervention on Cognitive Function                                                                                                                                         |
| 95  | NCT01692340 | Novel 13C Carotenoids for Absorption and Metabolism Studies in Humans                                                                                                                                  |
| 96  | NCT01730898 | Lutein Absorption in Healthy Adults                                                                                                                                                                    |
| 97  | NCT01696773 | Carotenoid and Flavonoid Absorption From Red and Tangerine-Type Tomatoes                                                                                                                               |
| 98  | NCT01695148 | Efficacy of $\beta$ -carotene Biofortified Maize in Reducing Vitamin A Deficiency Among Children                                                                                                       |
| 99  | NCT01665469 | Effect of Tomato Extracted Lycopene on Postprandial Oxidation and inflammation in Healthy Weight Men and Women                                                                                         |
| 100 | NCT01680510 | The Effect of Oral Administration of 9-cis $\beta$ Carotene Rich Powder of the Alga Dunaliella Bardawil                                                                                                |
| 101 | NCT01667510 | Effect of Cardio Mato (Grade A Lyc-O-Mato, a Tomato Extracted Lycopene) on Blood Pressure                                                                                                              |
| 102 | NCT01726127 | Green Vegetables and Women's Health                                                                                                                                                                    |
| 103 | NCT01621646 | The Effect of Daily Consumption of Eggs on Cognitive Function in the Elderly                                                                                                                           |
| 104 | NCT01620567 | Consumption of Potatoes, Avocados and Chickpeas and Cognitive Function in Older Adults                                                                                                                 |
| 105 | NCT01628081 | The Effect of Alga Dunaliella Bardawil on Psoriasis                                                                                                                                                    |
| 106 | NCT01614483 | Efficacy of Yellow Cassava to Improve Vitamin A Status of Kenyan School Children                                                                                                                       |
| 107 | NCT01803659 | Effect of Small Daily Doses of B-carotene on Breast Milk Retinol                                                                                                                                       |
| 108 | NCT02257801 | Effects of Lutein on Learning and Memory in Chronically Stressed Subjects and in an Acute Stressful Situation (TSST - Trier Social Stress Test): A Randomized, Double-blind, Placebo-controlled Trial) |
| 109 | NCT01922713 | Effect of Daily Consumption of Orange Maize on Breast Milk Retinol in Lactating Zambian Women                                                                                                          |
| 110 | NCT02587117 | A Clinical Trial to Study the Effects of Two Drugs, Lycopene and Prednisolone in Patients With Oral Lichen Planus                                                                                      |
| 111 | NCT02263352 | A Clinical Trial to Study the Effect of Lycopene in Patients With Gum Disease and type2 Diabetes Mellitus                                                                                              |
| 112 | NCT02263183 | Red Palm Olein and Cardiovascular Health                                                                                                                                                               |

|     |             |                                                                                                                                                                  |
|-----|-------------|------------------------------------------------------------------------------------------------------------------------------------------------------------------|
| 113 | NCT01968369 | Effects of Tomato Sauce on Endothelial Dysfunction Induced by a High Fat Meal in Healthy Subjects                                                                |
| 114 | NCT03492593 | Lycopene and Beta-carotene Metabolism in the Digestive Tract of Healthy Men                                                                                      |
| 115 | NCT02200263 | The Effects of Lutein and Zeaxanthin Supplementation on Vision in Patients With Albinism                                                                         |
| 116 | NCT02246985 | Bioavailability of Carotenoids Added Into Processed Foods                                                                                                        |
| 117 | NCT01951313 | Effects of Egg Consumption on Carotenoid Absorption From Co-consumed, Non-Egg Food                                                                               |
| 118 | NCT02210507 | Beta-carotene Absorption and Bioconversion to Vitamin A From Biofortified Cassava Gari                                                                           |
| 119 | NCT02069522 | Healthy Term Infants Fed Milk-Based Formulas                                                                                                                     |
| 120 | NCT02088242 | Physiological and Molecular Influences of Astaxanthin Supplementation on Heat Strain in Humans                                                                   |
| 121 | NCT02380144 | Bioavailability of Carotenoids and Flavonoids From Fresh Oranges and Orange Juice.                                                                               |
| 122 | NCT02113254 | Study of the Macular Pigment by the Consumption of Corn With Strong Content in Zeaxanthine                                                                       |
| 123 | NCT02343497 | Lipid-lowering Effects of an Astaxanthin Supplement in Volunteers With Mild Dyslipidaemia                                                                        |
| 124 | NCT02369666 | LycoRed 40051 Product as a Countermeasure to Exercise Stress                                                                                                     |
| 125 | NCT04015544 | Markers of Atherosclerosis in Overweight, Postmenopausal Women Following Daily Watermelon Consumption                                                            |
| 126 | NCT02468882 | Does Watercress Intake Have an Impact on Cancer Patients Outcomes: a Longitudinal Trial                                                                          |
| 127 | NCT03932305 | Randomized Controlled Trial of Lutein as a Novel Neuroprotective Adjunctive Therapy to Improve Visual Outcome of Rhegmatogenous Retinal Detachment (LUNAR Study) |
| 128 | NCT02550483 | Novel Metabolites of Beta-Carotene and Lycopene                                                                                                                  |
| 129 | NCT02450227 | Carotenoid Absorption and Metabolism From Green-leafy Vegetable Matrices                                                                                         |
| 130 | NCT02136303 | Regional Kale as Source of Lutein and Zeaxanthin to Improve Vision of AMD-patients                                                                               |
| 131 | NCT02373943 | The MULTINUTRIENT Maize Project: Results of Human Feeding Trial                                                                                                  |
| 132 | NCT02679794 | Impact of Egg Consumption on Carotenoid and Vitamin D Bioavailability in Pre- and Post-menopausal Women                                                          |
| 133 | NCT02379169 | Effects of Sea Buckthorn Oil and Lutein on Eye Health                                                                                                            |
| 134 | NCT02397811 | Astaxanthin Formulation Bioavailability                                                                                                                          |
| 135 | NCT03203746 | Gingival Crevicular Fluid Levels of Protein Carbonyl Following the Use of Lycopene in Chronic Periodontitis                                                      |
| 136 | NCT01102504 | Supplementation of Lycopene in Carotid Atheroma                                                                                                                  |
| 137 | NCT02144649 | Tangerine or Red Tomato Juice in Treating Patients With Prostate Cancer Undergoing Surgery                                                                       |

|     |             |                                                                                                                                |
|-----|-------------|--------------------------------------------------------------------------------------------------------------------------------|
| 138 | NCT04306406 | Molecular Mechanisms of Raspberries Effect on Insulin Resistance and Inflammation                                              |
| 139 | NCT03820245 | Effect of Short-term Annatto Carotenoids Supplementation on Oxidative Stress Status in Healthy Individuals                     |
| 140 | NCT02800408 | Comparison of Beta-cryptoxanthin Bioavailability From Biofortified Maize in Humans                                             |
| 141 | NCT03310359 | Clinical Trial of Anti-oxidant Astaxanthin in Insulin-resistant Subjects                                                       |
| 142 | NCT03167268 | Panitumumab Skin Toxicity Prevention Trial                                                                                     |
| 143 | NCT03463967 | Effects of Tomato Products in Children With NAFLD                                                                              |
| 144 | NCT02804490 | Efficacy of Biofortified Maize to Improve Maternal and Infant Vitamin A Status                                                 |
| 145 | NCT03520725 | Antioxidant Capacity and Vitamin A Profile in Young Adults Who Consume a Snack Bar Made From Tropical Fruits Treated With UV-C |
| 146 | NCT03581955 | Identification of New Biomarkers of Banana and Tomato Intake                                                                   |
| 147 | NCT02949115 | Effects of Red Beetroot Juice on High-Fat Meal-Induced Endothelial Dysfunction and Cardiometabolic Disturbances                |
| 148 | NCT02740439 | Persea Americana for Total Health (PATH ) Study                                                                                |
| 149 | NCT03626168 | Bioactive Compounds in Watermelon Modulating Oxidative Stress and Inflammation in Elders                                       |
| 150 | NCT03113864 | Effects of Lutein on Visual Function                                                                                           |
| 151 | NCT03873909 | Bioavailability of Carotenoids Present in Mamey Sapote (Pouteria Sapota (Jacq.) H. E. Moore & Stearn) Fruit                    |
| 152 | NCT04460365 | European Nutrition in Glaucoma Management Trial                                                                                |
| 153 | NCT03237702 | Decipher Lethal Prostate Cancer Biology - Urine Metabolomics                                                                   |
| 154 | NCT03209817 | Tomato Supplementation and Cardiovascular Health                                                                               |
| 155 | NCT03256123 | The Effects of Biscuits Containing Red Palm Oil on School Children With Vitamin A Deficiency in West and East Malaysia         |
| 156 | NCT02903433 | Effects of Avocado Intake on the Nutritional Status of Families                                                                |
| 157 | NCT03340103 | Early Administration of the Lutein/Zeaxanthin in Premature Newborns                                                            |
| 158 | NCT03807050 | Safety and Pharmacokinetics of Phaffia Rhodozyma Astaxanthin                                                                   |
| 159 | NCT04741763 | Night Vision and Carotenoids                                                                                                   |
| 160 | NCT03202043 | The Juice Study: Sensitivity of Skin Carotenoid Status to Detect Change in Intake                                              |
| 161 | NCT04652739 | Evaluation of Lycopene in the Treatment of Erosive Oral Lichen Planus                                                          |
| 162 | NCT03521349 | Correlational and Intervention Effects of Egg Consumption on Macular Carotenoids, Cognition, and Achievement During Childhood  |
| 163 | NCT03964935 | Lycopene vs Minocycline Hydrochloride as Adjunctive to Periodontal Treatment                                                   |
| 164 | NCT03443882 | Bioavailability of Astaxanthin Formulations                                                                                    |
| 165 | NCT03590756 | Influence of Mango Intake of Skin Health in Postmenopausal Women                                                               |
| 166 | NCT04583722 | Evaluating Astaxanthin Bioavailability, and a New Technology for Improving it, Using Natural Food Materials Only               |
| 167 | NCT03535844 | Cardio-vascular Protective Effects of Wolfberry in Middle-aged and Older Adults                                                |
| 168 | NCT04153968 | Bioefficacy of Beta-cryptoxanthin From Biofortified Maize                                                                      |

|     |             |                                                                                                                                                             |
|-----|-------------|-------------------------------------------------------------------------------------------------------------------------------------------------------------|
| 169 | NCT03959592 | Macular Pigment and Visual Performance in Glaucoma Patients                                                                                                 |
| 170 | NCT03811977 | The Effect of 12-Week Dietary Intake of Lutein on Minimal Erythema Dose and Other Skin Parameters                                                           |
| 171 | NCT04078646 | Influence of Proteins on the Bioavailability of Carotenoids                                                                                                 |
| 172 | NCT03983525 | The Effect of Gojiberry Intake (Lycium Barbarium) on Macular Function                                                                                       |
| 173 | NCT03769779 | Evaluation of the Benefits of FloraGLO™ Lutein on Skin Health                                                                                               |
| 174 | NCT03783013 | Tomato Juice for Health Study                                                                                                                               |
| 175 | NCT03773497 | Bioavailability of Phytonutrients From Novel Preparations of Broccoli                                                                                       |
| 176 | NCT03838536 | Synergistic Activity of Human Milk Nutrients and Infant Cognition                                                                                           |
| 177 | NCT03951883 | Does Increased Egg Consumption Have Cognitive and Neural Benefits in Food Insecure, At-risk Adolescents?                                                    |
| 178 | NCT03825276 | Effect of Mango on Gut Microbiota and Metabolic Health                                                                                                      |
| 179 | NCT03991286 | The Effect of Astaxanthin on Hormonal Parameters and Oxidative Stress Indices in Patients With Polycystic Ovary Syndrome                                    |
| 180 | NCT04689984 | The Benefits of Astaxanthin as Add on Therapy in the Management of Painful Diabetic Neuropathy Patient                                                      |
| 181 | NCT04234334 | Benefits of Eggs in Combination With a Plant-based Diet                                                                                                     |
| 182 | NCT04786392 | Food or Supplemental Lutein Absorption                                                                                                                      |
| 183 | NCT04843813 | Effects of Lutein Supplementation on Cognition and MPOD in Multiple Sclerosis Patients-                                                                     |
| 184 | NCT04056624 | Examining Validity and Sensitivity of Pressure-Mediated Reflection Spectroscopy                                                                             |
| 185 | NCT03664466 | Astaxanthin Effects on Osteoarthritis Associated Pain and Inflammatory Indicators                                                                           |
| 186 | NCT02018692 | The Effect of Oral Administration of 9-cis Rich Powder of the Alga Dunaliella Bardawil on Visual Functions in Adolescent Patients With Retinitis Pigmentosa |
| 187 | NCT04869852 | Effects of Mango Intake on Skin Health and Gut Microbiome Changes in Postmenopausal Women                                                                   |
| 188 | NCT04792216 | Salmon Intake and Gut Health in Adults                                                                                                                      |
| 189 | NCT05046457 | Beta-cryptoxanthin Supplement: Absorption and Function                                                                                                      |
| 190 | NCT05015374 | Effect of Astaxanthin on the Patients With Alzheimer Disease                                                                                                |
| 191 | NCT05009810 | Efficacy and Safety of Astaxanthin in Volunteer With Refraction Errors                                                                                      |
| 192 | NCT05064865 | Impact of Regular Consumption of Grapes on Eye Health in Singapore Older Adults                                                                             |
| 193 | NCT04974450 | Trigona Honey and Intestinal Microbiota Among Obese People                                                                                                  |
